# Supplementary material
Source: MDPI journal article supplement (https://www.mdpi.com/1999-4907/9/8/469)
Supplement: s1 [file s1]

**Table S5** Frequency of null alleles at the SSR loci

| Population        | sfc0018 | sfc0161 | sfc1063 | sfc1143 | GOT066 | FIR065 | FIR004 | FS3-04 | mfs11  | Mean   |
|-------------------|---------|---------|---------|---------|--------|--------|--------|--------|--------|--------|
| adult populations |         |         |         |         |        |        |        |        |        |        |
| DE-SEW5           | 0.0575  | 0       | 0.0434  | 0.0041  | 0      | 0.1976 | 0.0637 | 0      | 0      | 0.0407 |
| DE-SEW9           | 0       | 0       | 0       | 0       | 0.0234 | 0.2036 | 0.106  | 0.0345 | 0      | 0.0408 |
| DE-GL             | 0.0076  | 0       | 0       | 0       | 0      | 0.2461 | 0.015  | 0.0472 | 0      | 0.0351 |
| DE-GS             | 0.0359  | 0.0253  | 0       | 0       | 0.0712 | 0.1968 | 0.0843 | 0.0504 | 0.0045 | 0.0520 |
| DE-US             | 0.0281  | 0       | 0.0061  | 0       | 0      | 0.115  | 0.0746 | 0.0907 | 0      | 0.0349 |
| DE-CL             | 0.0093  | 0.0612  | 0.0273  | 0       | 0      | 0.1456 | 0.0452 | 0.0108 | 0      | 0.0333 |
| DE-CS             | 0.0024  | 0.0101  | 0.0141  | 0.0103  | 0      | 0.1722 | 0.0378 | 0      | 0      | 0.0274 |
| DE-HA             | 0.0234  | 0.0118  | 0       | 0       | 0.0297 | 0.1859 | 0.1047 | 0.073  | 0      | 0.0476 |
| DE-HEW10          | 0.0306  | 0       | 0.0031  | 0.0472  | 0      | 0.0989 | 0.0675 | 0.0594 | 0      | 0.0341 |
| DE-HEW6           | 0.0034  | 0.0058  | 0.0052  | 0.05    | 0      | 0.121  | 0.0391 | 0      | 0      | 0.0249 |
| DE-AEW5           | 0.0159  | 0       | 0.0043  | 0.0082  | 0.0191 | 0.0424 | 0.0757 | 0.0248 | 0      | 0.0212 |
| DE-AEW8           | 0       | 0       | 0.01    | 0       | 0.0208 | 0.0791 | 0.1404 | 0      | 0      | 0.0278 |
| CH-E-Felsberg     | 0       | 0       | 0       | 0.0566  | 0      | 0.0628 | 0.0994 | 0.0466 | 0      | 0.0295 |
| CH-E-Chur         | 0.0512  | 0       | 0       | 0       | na     | 0.0265 | 0.0448 | 0.0662 | 0      | 0.0236 |
| CH-E-Malans       | 0       | 0.021   | 0       | 0       | 0      | 0      | 0.027  | 0      | 0.0016 | 0.0055 |
| CH-E-Mastrils     | 0       | 0       | 0       | 0.0265  | 0      | 0      | 0.0175 | 0.022  | 0.0077 | 0.0082 |
| CH-E-Sargans      | 0       | 0.0308  | 0.1106  | 0       | 0      | 0.1505 | 0      | 0      | 0      | 0.0324 |
| CH-E-Mels         | 0       | 0       | 0.0366  | 0       | 0      | 0      | 0.0707 | 0      | 0      | 0.0119 |
| CH-W-Ardon        | 0.0246  | 0.0145  | 0       | 0       | 0      | 0.0775 | 0.1184 | 0.0866 | 0      | 0.0357 |
| CH-W-Chamoson     | 0       | 0       | 0       | 0       | 0      | 0      | 0.0953 | 0      | 0      | 0.0106 |
| CH-W-Saxon        | 0.0049  | 0       | 0       | 0       | 0      | 0.0194 | 0.1013 | 0.1781 | 0      | 0.0337 |
| CH-W-Martigny     | 0.065   | 0       | 0.0121  | 0       | 0      | 0.1017 | 0.0017 | 0      | 0.12   | 0.0334 |
| CH-W-Collombey    | 0.0431  | 0       | 0       | 0.0448  | 0      | 0      | 0.0599 | 0.0128 | 0.044  | 0.0227 |
| CH-W-Ollon        | 0       | 0       | 0       | 0       | 0      | 0.0667 | 0      | 0.0626 | 0      | 0.0144 |

| Population     | sfc0018 | sfc0161 | sfc1063 | sfc1143 | GOT066    | FIR065 | FIR004 | FS3-04 | mfs11  | Mean   |
|----------------|---------|---------|---------|---------|-----------|--------|--------|--------|--------|--------|
|                |         |         |         |         | seedlings |        |        |        |        |        |
| DE-SEW5        | 0.0173  | 0       | 0.0338  | 0       | 0         | 0      | 0.1726 | 0.0596 | 0.0297 | 0.0348 |
| DE-SEW9        | 0.0009  | 0       | 0.0272  | 0.025   | 0.0349    | 0.0263 | 0.0959 | 0.0892 | 0      | 0.0333 |
| DE-GL          | 0.0187  | 0.0106  | 0.0232  | 0.0464  | 0         | 0.0247 | 0.0234 | 0      | 0.0112 | 0.0176 |
| DE-GS          | 0.0005  | 0.0109  | 0       | 0.0131  | 0         | 0      | 0.0832 | 0.023  | 0.0026 | 0.0148 |
| DE-US          | 0.0294  | 0       | 0       | 0.0423  | 0         | 0.035  | 0.0892 | 0.046  | 0.0216 | 0.0293 |
| DE-CL          | 0.0094  | 0.0011  | 0.052   | 0       | 0         | 0.0071 | 0.072  | 0.0019 | 0.0151 | 0.0176 |
| DE-CS          | 0.0176  | 0       | 0.0241  | 0       | 0         | 0.0412 | 0.0146 | 0.0303 | 0.0071 | 0.0150 |
| DE-HA          | 0.0084  | 0.012   | 0.0296  | 0       | 0         | 0      | 0.0943 | 0      | 0      | 0.0160 |
| DE-HEW10       | 0.0094  | 0       | 0.0195  | 0       | 0.0721    | 0.008  | 0.1397 | 0.0436 | 0      | 0.0325 |
| DE-HEW6        | 0.0167  | 0       | 0       | 0.0259  | 0         | 0      | 0.1081 | 0      | 0      | 0.0167 |
| DE-AEW5        | 0.0114  | 0.0318  | 0.0444  | 0       | 0         | 0      | 0.1715 | 0.0603 | 0      | 0.0355 |
| DE-AEW8        | 0.0158  | 0       | 0       | 0       | 0         | 0.008  | 0.0793 | 0.0174 | 0      | 0.0134 |
| CH-E-Felsberg  | 0       | 0.0454  | 0.0326  | 0.0479  | 0         | 0      | 0      | 0.0099 | 0.0298 | 0.0184 |
| CH-E-Chur      | 0       | 0.0318  | 0       | 0.0035  | 0         | 0      | 0.079  | 0.0331 | 0      | 0.0164 |
| CH-E-Malans    | 0.0097  | 0       | 0.0492  | 0.0266  | 0         | 0      | 0.0359 | 0      | 0      | 0.0135 |
| CH-E-Mastrils  | 0.0284  | 0.0791  | 0       | 0       | 0         | 0      | 0.0243 | 0      | 0.049  | 0.0201 |
| CH-E-Sargans   | 0       | 0.0231  | 0       | 0       | 0         | 0      | 0      | 0      | 0      | 0.0026 |
| CH-E-Mels      | 0.0167  | 0       | 0.0047  | 0       | 0         | 0      | 0      | 0.0158 | 0      | 0.0041 |
| CH-W-Ardon     | 0.0342  | 0       | 0       | 0       | 0         | 0.0333 | 0.0108 | 0.0185 | 0.0118 | 0.0121 |
| CH-W-Chamoson  | 0.0306  | 0       | 0.0161  | 0       | 0         | 0.0003 | 0.0035 | 0.0503 | 0      | 0.0112 |
| CH-W-Saxon     | 0.0058  | 0.0391  | 0       | 0.0238  | 0         | 0.0005 | 0      | 0.0767 | 0      | 0.0162 |
| CH-W-Martigny  | 0       | 0       | 0       | 0       | 0         | 0.0057 | 0.0638 | 0.0159 | 0.0038 | 0.0099 |
| CH-W-Collombey | 0.0395  | 0.054   | 0.0237  | 0.022   | 0         | 0      | 0      | 0.0214 | 0      | 0.0178 |
| CH-W-Ollon     | 0       | 0       | 0       | 0       | 0         | 0      | 0.0042 | 0      | 0      | 0.0005 |
