# Supplementary material
Source: MDPI journal article supplement (https://www.mdpi.com/1999-4907/9/8/469)
Supplement: s1 [file s1]

**Table S6** Estimated effective population sizes ( $N_e$ )

| Population     | Seedlings | Adults   |
|----------------|-----------|----------|
| DE-SEW5        | 138.3     | 128.8    |
| DE-SEW9        | 207.1     | 82.3     |
| DE-GL          | 145.7     | 94.1     |
| DE-GS          | 563       | 689.9    |
| DE-US          | 200.8     | 120      |
| DE-CL          | 250.9     | 87.7     |
| DE-CS          | 366.5     | 700.1    |
| DE-HA          | 209.5     | 187.7    |
| DE-HEW10       | 571.6     | 259      |
| DE-HEW6        | 657.3     | 355.3    |
| DE-AEW5        | 224.9     | 422.7    |
| DE-AEW8        | 204.2     | 95.6     |
| CH-E-Felsberg  | 139.3     | 176.9    |
| CH-E-Chur      | 88.1      | Infinite |
| CH-E-Malans    | 188.2     | 120.9    |
| CH-E-Mastrils  | 394.2     | 400.3    |
| CH-E-Sargans   | 95.8      | Infinite |
| CH-E-Mels      | 235.2     | 477.8    |
| CH-W-Ardon     | 86        | 197.5    |
| CH-W-Chamoson  | 139.8     | 632.1    |
| CH-W-Saxon     | 711.6     | 148.5    |
| CH-W-Martigny  | 162.9     | Infinite |
| CH-W-Collombey | 146.1     | Infinite |
| CH-W-Ollon     | 161.9     | 161.6    |
