# Supplementary material
Source: MDPI journal article supplement (https://www.mdpi.com/1999-4907/9/8/469)
Supplement: s1 [file s1]

**Table S1** Sampling details of the study

| Population     | Number of<br>adult trees | Sample year | Number of<br>seedlings | Sample year       |
|----------------|--------------------------|-------------|------------------------|-------------------|
| DE-SEW5        | 200                      | 2008        | 100                    | 2011 <sup>a</sup> |
| DE-SEW9        | 198                      | 2008        | 100                    | 2011 <sup>a</sup> |
| DE-GL          | 100                      | 2009        | 148                    | 2009 <sup>a</sup> |
| DE-GS          | 103                      | 2009        | 129                    | 2009 <sup>a</sup> |
| DE-US          | 100                      | 2009        | 149                    | 2009 <sup>a</sup> |
| DE-CL          | 101                      | 2009        | 134                    | 2009 <sup>a</sup> |
| DE-CS          | 104                      | 2009        | 142                    | 2009 <sup>a</sup> |
| DE-HA          | 99                       | 2011        | 152                    | 2009 <sup>a</sup> |
| DE-HEW10       | 200                      | 2008        | 179                    | 2011 <sup>a</sup> |
| DE-HEW6        | 200                      | 2008        | 100                    | 2011 <sup>a</sup> |
| DE-AEW5        | 198                      | 2008        | 169                    | 2011 <sup>a</sup> |
| DE-AEW8        | 199                      | 2008        | 100                    | 2011 <sup>a</sup> |
| CH-E-Felsberg  | 25                       | 2014        | 62                     | 2011              |
| CH-E-Chur      | 25                       | 2014        | 63                     | 2011              |
| CH-E-Malans    | 25                       | 2014        | 64                     | 2011              |
| CH-E-Mastrils  | 25                       | 2014        | 62                     | 2011              |
| CH-E-Sargans   | 25                       | 2014        | 63                     | 2011              |
| CH-E-Mels      | 25                       | 2014        | 60                     | 2011              |
| CH-W-Ardon     | 25                       | 2014        | 63                     | 2011              |
| CH-W-Chamoson  | 25                       | 2014        | 64                     | 2011              |
| CH-W-Saxon     | 25                       | 2014        | 64                     | 2011              |
| CH-W-Martigny  | 25                       | 2014        | 64                     | 2011              |
| CH-W-Collombey | 25                       | 2014        | 63                     | 2011              |
| CH-W-Ollon     | 25                       | 2014        | 63                     | 2011              |

<sup>a</sup>year in which the beechnuts were collected. The beechnuts were germinated and leaf samples taken from established seedlings
