# Supplementary material
Source: MDPI journal article supplement (https://www.mdpi.com/1999-4907/9/8/469)
Supplement: s1 [file s1]

**Table S3**  $F_{IS}$  values of the different populations displayed for the different SSR markers

| Population     | sfc0018 | sfc0161 | sfc1063 | sfc1143 | GOT066 | FIR065 | FIR004 | FS3-04 | mfs11  |
|----------------|---------|---------|---------|---------|--------|--------|--------|--------|--------|
| seedlings      |         |         |         |         |        |        |        |        |        |
| DE-SEW5        | 0.046   | 0.035   | 0.095   | 0.005   | -0.092 | -0.05  | 0.354  | 0.12   | 0.085  |
| DE-SEW9        | 0.053   | 0.001   | 0.049   | 0.071   | 0.08   | 0.073  | 0.218  | 0.117  | -0.042 |
| DE-GL          | 0.042   | 0.015   | 0.038   | 0.088   | -0.091 | 0.065  | 0.053  | -0.065 | 0.066  |
| DE-GS          | -0.064  | 0.026   | 0.03    | 0.059   | -0.041 | -0.032 | 0.09   | -0.014 | 0.02   |
| DE-US          | 0.082   | -0.003  | -0.007  | 0.099   | -0.078 | 0.056  | 0.196  | 0.149  | 0.063  |
| DE-CL          | 0.001   | -0.003  | 0.102   | -0.027  | -0.024 | -0.02  | 0.109  | -0.006 | -0.04  |
| DE-CS          | 0.041   | -0.049  | 0.034   | -0.003  | -0.093 | 0.088  | 0      | 0.057  | -0.035 |
| DE-HA          | -0.01   | 0.026   | 0.06    | 0.01    | -0.089 | -0.048 | 0.178  | -0.039 | -0.021 |
| DE-HEW10       | 0.024   | -0.013  | 0.055   | 0.012   | 0.221  | 0.043  | 0.318  | 0.055  | -0.053 |
| DE-HEW6        | 0.067   | -0.052  | -0.04   | 0.059   | -0.063 | -0.045 | 0.214  | -0.055 | -0.023 |
| DE-AEW5        | -0.004  | 0.083   | 0.116   | 0.007   | -0.046 | -0.051 | 0.37   | 0.003  | 0.033  |
| DE-AEW8        | 0.015   | 0.054   | -0.006  | -0.036  | -0.049 | 0.015  | 0.092  | 0.051  | 0.043  |
| CH-E-Felsberg  | -0.098  | 0.108   | 0.04    | 0.129   | 0      | -0.06  | -0.099 | 0.041  | 0.046  |
| CH-E-Chur      | -0.008  | 0.038   | -0.041  | 0.053   | -0.069 | -0.118 | 0.135  | 0.009  | 0.048  |
| CH-E-Malans    | 0       | -0.119  | 0.115   | 0.029   | -0.136 | -0.038 | 0.088  | -0.108 | 0.015  |
| CH-E-Mastrils  | 0.056   | 0.18    | -0.081  | -0.036  | -0.044 | -0.012 | 0.095  | -0.275 | 0.158  |
| CH-E-Sargans   | -0.103  | 0.075   | -0.058  | -0.041  | -0.051 | -0.077 | -0.08  | -0.016 | 0.041  |
| CH-E-Mels      | -0.01   | -0.105  | 0.056   | 0.025   | -0.135 | 0.007  | -0.068 | -0.019 | -0.041 |
| CH-W-Ardon     | 0.131   | -0.022  | -0.072  | -0.003  | -0.035 | 0.07   | -0.056 | 0.037  | 0.009  |
| CH-W-Chamoson  | 0.08    | -0.02   | 0.047   | -0.056  | -0.016 | -0.05  | -0.04  | 0.159  | -0.031 |
| CH-W-Saxon     | 0.004   | 0.095   | -0.024  | 0.054   | -0.008 | -0.034 | -0.038 | 0.117  | 0.003  |
| CH-W-Martigny  | 0.031   | -0.099  | -0.064  | -0.038  | -0.033 | -0.021 | 0.155  | -0.014 | -0.032 |
| CH-W-Collombey | 0.121   | 0.123   | 0.101   | 0.064   | -0.034 | -0.084 | -0.018 | 0.057  | 0.039  |
| CH-W-Ollon     | 0.035   | 0.028   | 0.028   | -0.098  | -0.008 | -0.051 | 0.037  | -0.182 | 0.014  |

| Population     | sfc0018 | sfc0161 | sfc1063 | sfc1143 | GOT066 | FIR065 | FIR004 | FS3-04 | mfs11  |
|----------------|---------|---------|---------|---------|--------|--------|--------|--------|--------|
| adults         |         |         |         |         |        |        |        |        |        |
| DE-SEW5        | 0.025   | 0.013   | 0.048   | 0.029   | -0.088 | 0.05   | 0.122  | -0.081 | -0.073 |
| DE-SEW9        | -0.067  | -0.026  | -0.04   | 0.013   | -0.048 | 0.004  | 0.253  | 0.005  | -0.056 |
| DE-GL          | 0.045   | -0.038  | 0.034   | -0.04   | -0.118 | 0.004  | 0.009  | -0.02  | -0.015 |
| DE-GS          | 0.093   | 0.043   | 0.017   | 0.016   | 0.249  | 0.086  | 0.122  | 0.078  | 0.028  |
| DE-US          | 0.097   | -0.135  | 0.006   | -0.025  | -0.091 | 0.032  | 0.2    | 0.113  | -0.069 |
| DE-CL          | 0.054   | 0.184   | 0.006   | -0.04   | -0.042 | 0.034  | 0.067  | -0.044 | 0      |
| DE-CS          | 0.033   | 0.038   | 0.035   | 0.06    | -0.058 | 0.074  | 0.105  | -0.155 | 0.05   |
| DE-HA          | 0.061   | 0.032   | -0.01   | -0.079  | 0.029  | 0.022  | 0.204  | 0.212  | -0.044 |
| DE-HEW10       | 0.072   | 0.012   | 0.037   | 0.129   | -0.065 | -0.04  | 0.135  | 0.024  | -0.082 |
| DE-HEW6        | 0.035   | 0.048   | -0.015  | 0.119   | -0.087 | -0.046 | 0.024  | -0.063 | -0.038 |
| DE-AEW5        | 0.008   | -0.01   | -0.011  | 0.007   | 0.025  | -0.051 | 0.025  | -0.036 | -0.072 |
| DE-AEW8        | -0.007  | -0.066  | 0.081   | 0.003   | 0.011  | -0.001 | 0.034  | -0.04  | -0.049 |
| CH-E-Felsberg  | -0.069  | -0.061  | 0.095   | 0.072   | 0      | 0.022  | 0.309  | 0.093  | -0.111 |
| Ch-E-Chur      | 0.193   | 0.056   | -0.018  | -0.017  | NA     | -0.133 | 0.132  | 0.218  | -0.182 |
| CH-E-Malans    | -0.009  | 0.175   | 0.038   | -0.098  | -0.095 | -0.366 | 0.057  | -0.234 | 0.123  |
| CH-E-Mastrils  | 0.085   | 0.022   | -0.09   | 0.007   | 0      | -0.129 | -0.021 | 0.087  | 0.077  |
| CH-E-Sargans   | -0.077  | 0.204   | 0.273   | -0.062  | 0      | 0.104  | 0.072  | -0.263 | -0.087 |
| Ch-E-Mels      | 0.053   | -0.057  | 0.101   | 0.087   | -0.043 | -0.072 | 0.238  | -0.02  | -0.105 |
| CH-W-Ardon     | 0.118   | 0.025   | 0.016   | -0.082  | 0      | -0.115 | 0.434  | 0.225  | -0.106 |
| CH-W-Chamoson  | 0.031   | 0.016   | -0.115  | 0.001   | 0      | -0.229 | 0.331  | -0.076 | 0.076  |
| CH-W-Saxon     | -0.035  | -0.099  | -0.034  | 0.124   | 0      | -0.007 | 0.295  | 0.441  | -0.053 |
| CH-W-Martigny  | 0.122   | 0.032   | 0.023   | -0.114  | -0.091 | 0.059  | 0.072  | -0.219 | 0.273  |
| CH-W-Collombey | 0.07    | -0.003  | -0.04   | 0.105   | 0      | -0.277 | 0.041  | 0.059  | 0.19   |
| CH-W-Ollon     | -0.103  | -0.009  | -0.089  | 0.017   | -0.043 | -0.007 | -0.253 | 0.157  | -0.06  |
