# Supplementary material
Source: MDPI journal article supplement (https://www.mdpi.com/1999-4907/9/8/469)
Supplement: s1 [file s1]

**Table S2** Genetic diversity indices for the different SSRs over all populations

| SSR     | Seedlings |       |       |       | Adults |       |       |       |
|---------|-----------|-------|-------|-------|--------|-------|-------|-------|
|         | $N_a$     | $A_R$ | $H_o$ | $H_e$ | $N_a$  | $A_R$ | $H_o$ | $H_e$ |
| sfc0018 | 10.2      | 9.5   | 0.689 | 0.700 | 8.7    | 7.6   | 0.681 | 0.698 |
| sfc0161 | 13.2      | 12    | 0.785 | 0.794 | 12.5   | 9.6   | 0.783 | 0.786 |
| sfc1063 | 9.5       | 9     | 0.778 | 0.792 | 8.7    | 7.9   | 0.779 | 0.781 |
| sfc1143 | 10.1      | 9.5   | 0.754 | 0.764 | 9.5    | 8.1   | 0.764 | 0.763 |
| GOT066  | 3.2       | 2.9   | 0.131 | 0.125 | 3.1    | 2.5   | 0.135 | 0.128 |
| FIR065  | 4.1       | 4.1   | 0.685 | 0.671 | 4      | 4     | 0.708 | 0.673 |
| FIR004  | 7.1       | 6.7   | 0.480 | 0.534 | 6.2    | 5.1   | 0.446 | 0.502 |
| FS3-04  | 3.7       | 3.5   | 0.422 | 0.421 | 3.3    | 2.8   | 0.402 | 0.408 |
| mfs11   | 8.3       | 7.7   | 0.663 | 0.668 | 7.8    | 6.5   | 0.681 | 0.663 |

$N_a$  - number of alleles,  $A_R$  - allelic richness,  $H_o$  - observed heterozygosity,  $H_e$  - expected heterozygosity
