# Supplementary material
Source: MDPI journal article supplement (https://www.mdpi.com/1999-4907/9/8/469)
Supplement: s1 [file s1]

**Table S8** Observed heterozygosity ( $H_o$ ) and expected heterozygosity ( $H_e$ ) based on SSRs for 25 randomly selected individuals per population

| Population     | Seedlings |       |       | Adults |       |       |
|----------------|-----------|-------|-------|--------|-------|-------|
|                | $N$       | $H_o$ | $H_e$ | $N$    | $H_o$ | $H_e$ |
| DE-SEW5        | 25        | 0.605 | 0.620 | 25     | 0.671 | 0.640 |
| DE-SEW9        | 25        | 0.596 | 0.615 | 25     | 0.600 | 0.565 |
| DE-GL          | 25        | 0.671 | 0.648 | 25     | 0.660 | 0.635 |
| DE-GS          | 25        | 0.631 | 0.624 | 25     | 0.578 | 0.640 |
| DE-US          | 25        | 0.498 | 0.567 | 25     | 0.618 | 0.592 |
| DE-CL          | 25        | 0.621 | 0.608 | 25     | 0.587 | 0.603 |
| DE-CS          | 25        | 0.650 | 0.633 | 25     | 0.587 | 0.617 |
| DE-HA          | 25        | 0.658 | 0.648 | 25     | 0.644 | 0.639 |
| DE-HEW10       | 25        | 0.632 | 0.623 | 25     | 0.609 | 0.601 |
| DE-HEW6        | 25        | 0.556 | 0.620 | 25     | 0.604 | 0.597 |
| DE-AEW5        | 25        | 0.606 | 0.648 | 25     | 0.613 | 0.595 |
| DE-AEW8        | 25        | 0.608 | 0.594 | 25     | 0.667 | 0.605 |
| CH-E-Felsberg  | 25        | 0.573 | 0.569 | 25     | 0.600 | 0.605 |
| CH-E-Chur      | 25        | 0.640 | 0.608 | 25     | 0.547 | 0.547 |
| CH-E-Malans    | 25        | 0.600 | 0.591 | 25     | 0.600 | 0.573 |
| CH-E-Mastrils  | 25        | 0.573 | 0.575 | 25     | 0.573 | 0.560 |
| CH-E-Sargans   | 25        | 0.618 | 0.591 | 25     | 0.596 | 0.604 |
| CH-E-Mels      | 25        | 0.564 | 0.580 | 25     | 0.582 | 0.582 |
| CH-W-Ardon     | 25        | 0.529 | 0.529 | 25     | 0.582 | 0.587 |
| CH-W-Chamoson  | 25        | 0.591 | 0.568 | 25     | 0.591 | 0.578 |
| CH-W-Saxon     | 25        | 0.569 | 0.584 | 25     | 0.573 | 0.595 |
| CH-W-Martigny  | 25        | 0.533 | 0.547 | 25     | 0.573 | 0.581 |
| CH-W-Collombey | 25        | 0.583 | 0.592 | 25     | 0.604 | 0.603 |
| CH-W-Ollon     | 25        | 0.622 | 0.590 | 25     | 0.573 | 0.542 |
| Mean           | 25        | 0.597 | 0.599 | 25     | 0.601 | 0.595 |
