# Supplementary material
Source: MDPI journal article supplement (https://www.mdpi.com/1999-4907/9/8/469)
Supplement: s1 [file s1]

**Table S4** Percentage of SSR pairs with significant linkage disequilibrium

| <b>Population</b> | <b>Adults</b> | <b>Seedlings</b> |
|-------------------|---------------|------------------|
| DE-SEW5           | 19.4          | 11.1             |
| DE-SEW9           | 27.8          | 19.4             |
| DE-GL             | 30.6          | 11.1             |
| DE-GS             | 8.3           | 2.8              |
| DE-US             | 8.3           | 8.3              |
| DE-CL             | 5.6           | 8.3              |
| DE-CS             | 0             | 5.6              |
| DE-HA             | 19.4          | 8.3              |
| DE-HEW10          | 11.1          | 11.1             |
| DE-HEW6           | 13.9          | 11.1             |
| DE-AEW5           | 0             | 8.3              |
| DE-AEW8           | 38.9          | 5.6              |
| CH-E-Felsberg     | 8.3           | 16.7             |
| CH-E-Chur         | 0             | 13.9             |
| CH-E-Malans       | 8.3           | 8.3              |
| CH-E-Mastrils     | 0             | 0.0              |
| CH-E-Sargans      | 2.8           | 5.6              |
| CH-E-Mels         | 2.8           | 13.9             |
| CH-W-Ardon        | 2.8           | 11.1             |
| CH-W-Chamoson     | 11.1          | 5.6              |
| CH-W-Saxon        | 2.8           | 8.3              |
| CH-W-Martigny     | 0             | 8.3              |
| CH-W-Collombey    | 2.8           | 8.3              |
| CH-W-Ollon        | 8.3           | 0.0              |
| <b>Mean</b>       | <b>9.7</b>    | <b>8.8</b>       |
