# Supplementary material
Source: MDPI journal article supplement (https://www.mdpi.com/1999-4907/9/8/469)
Supplement: s1 [file s1]

(a)

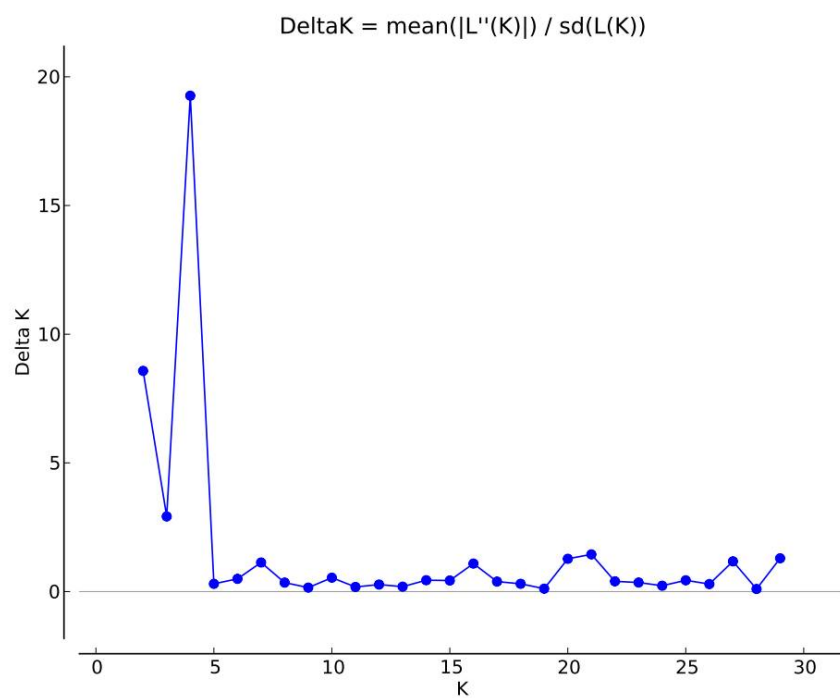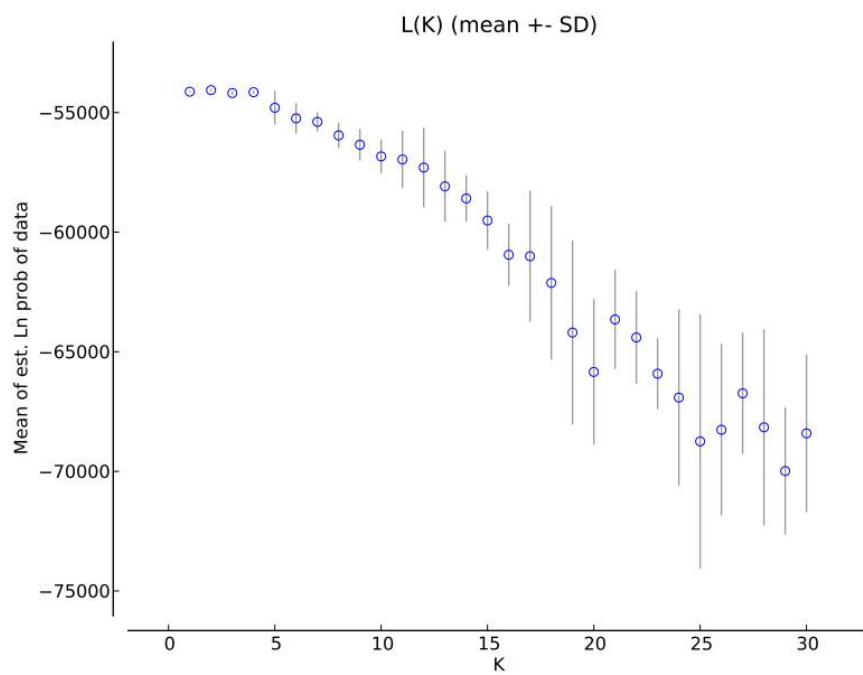

(b)

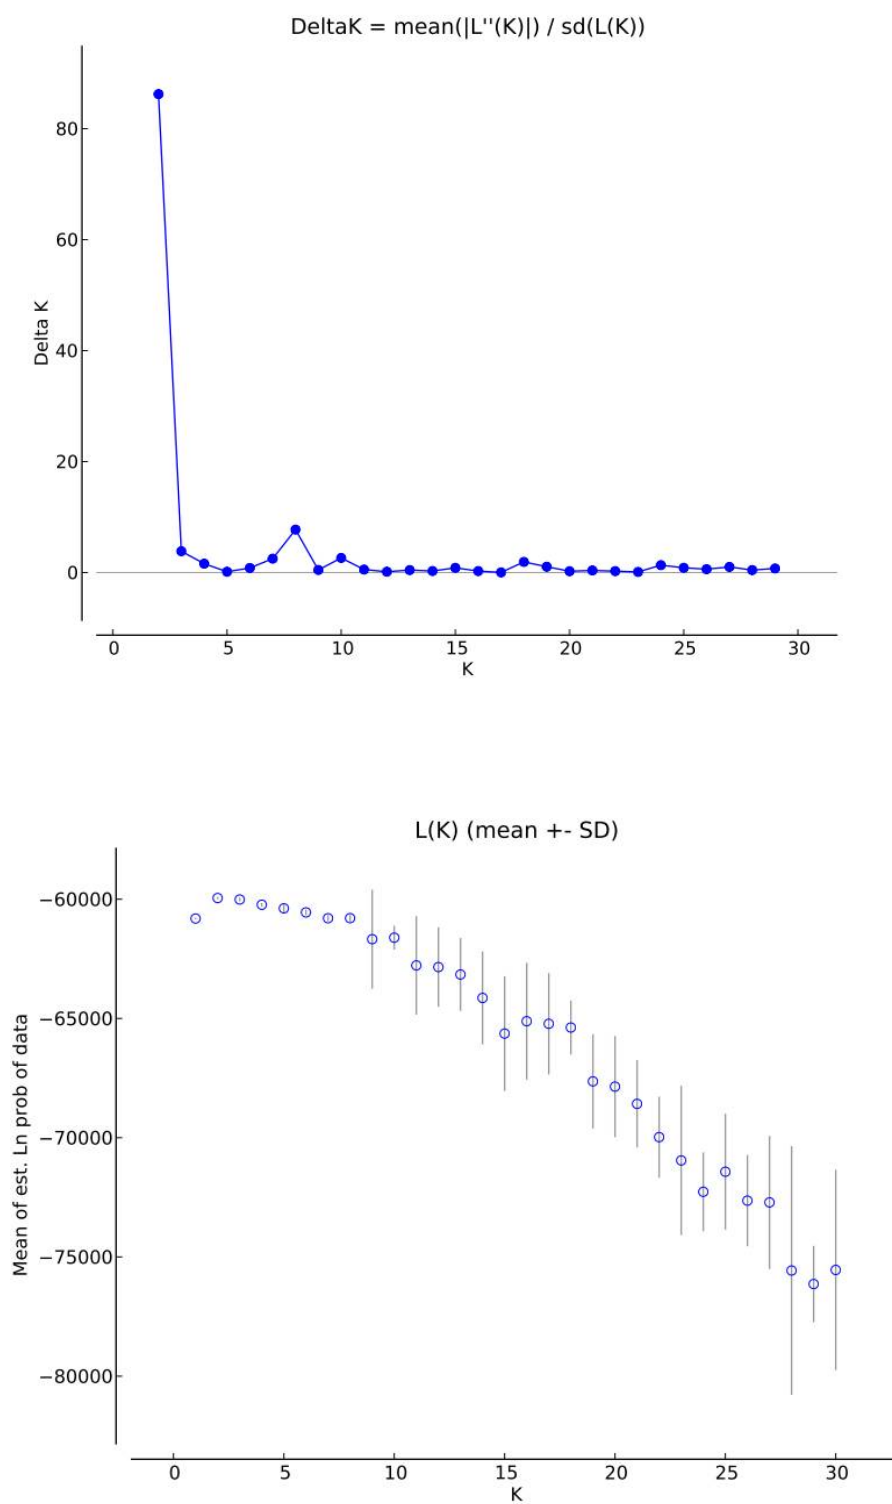

**Figure S3** Plots of delta  $K$  and log likelihood for each  $K$  based on SSRs for the adult (a) and seedling (b) populations
