# Supplementary material
Source: MDPI journal article supplement (https://www.mdpi.com/1999-4907/9/8/469)
Supplement: s1 [file s1]

(a)

$K = 2$

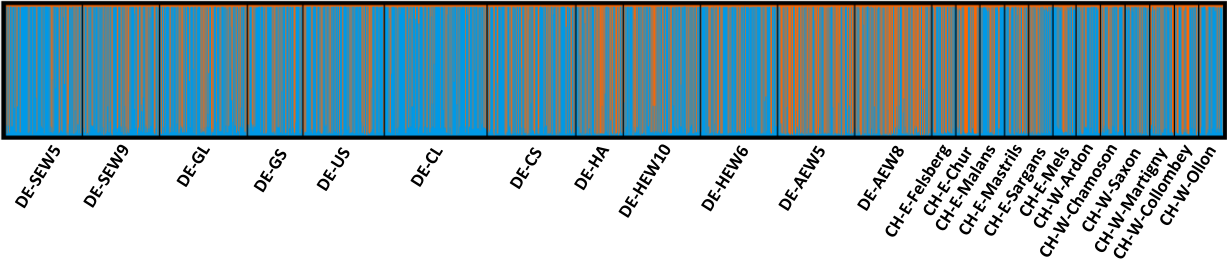

$K = 3$

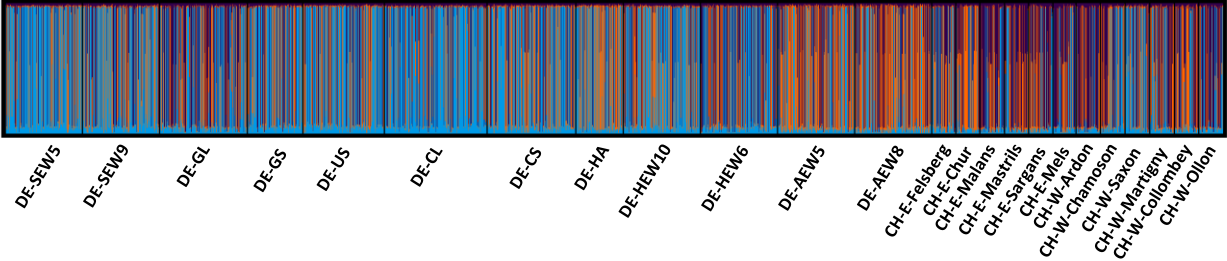

$K = 4$

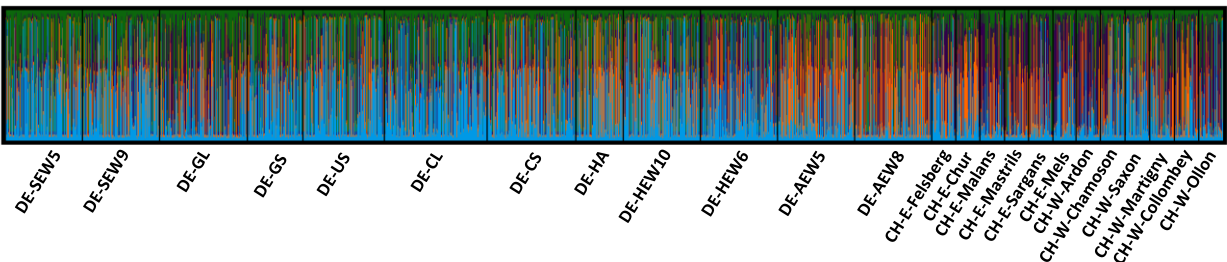

$K = 5$

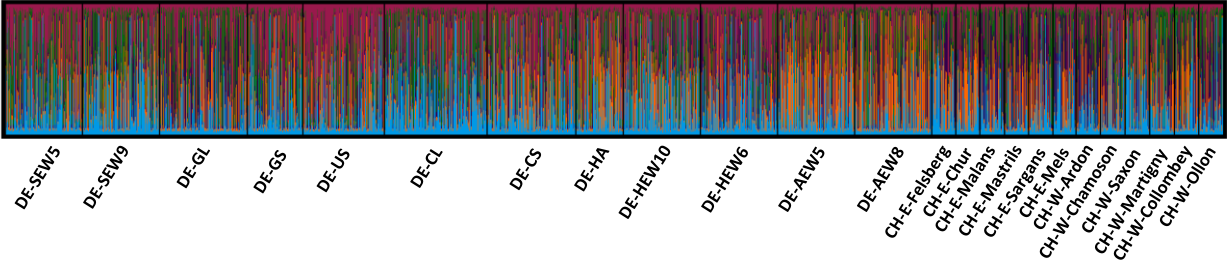

(b)

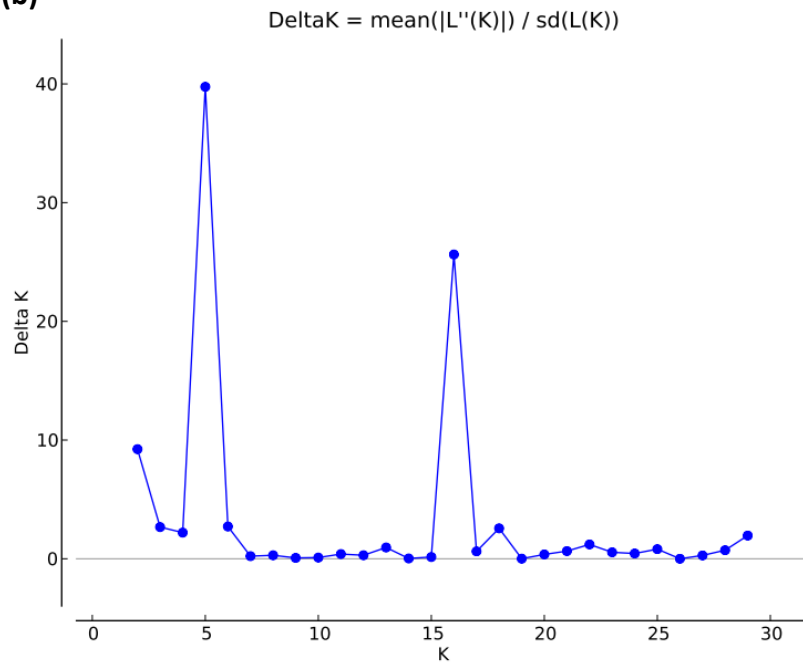

(c)

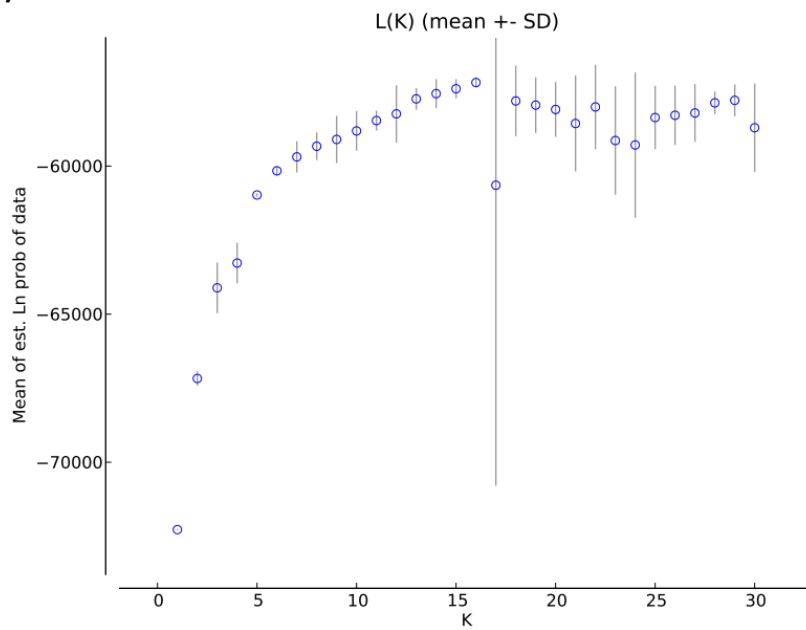

**Figure S5** Clustering of individuals for different  $K$  (a), plots of delta  $K$  (b) and log likelihood for each  $K$  (c) based on SNPs for the German and Swiss seedling populations
