# Supplementary material
Source: MDPI journal article supplement (https://www.mdpi.com/1999-4907/9/8/469)
Supplement: s1 [file s1]

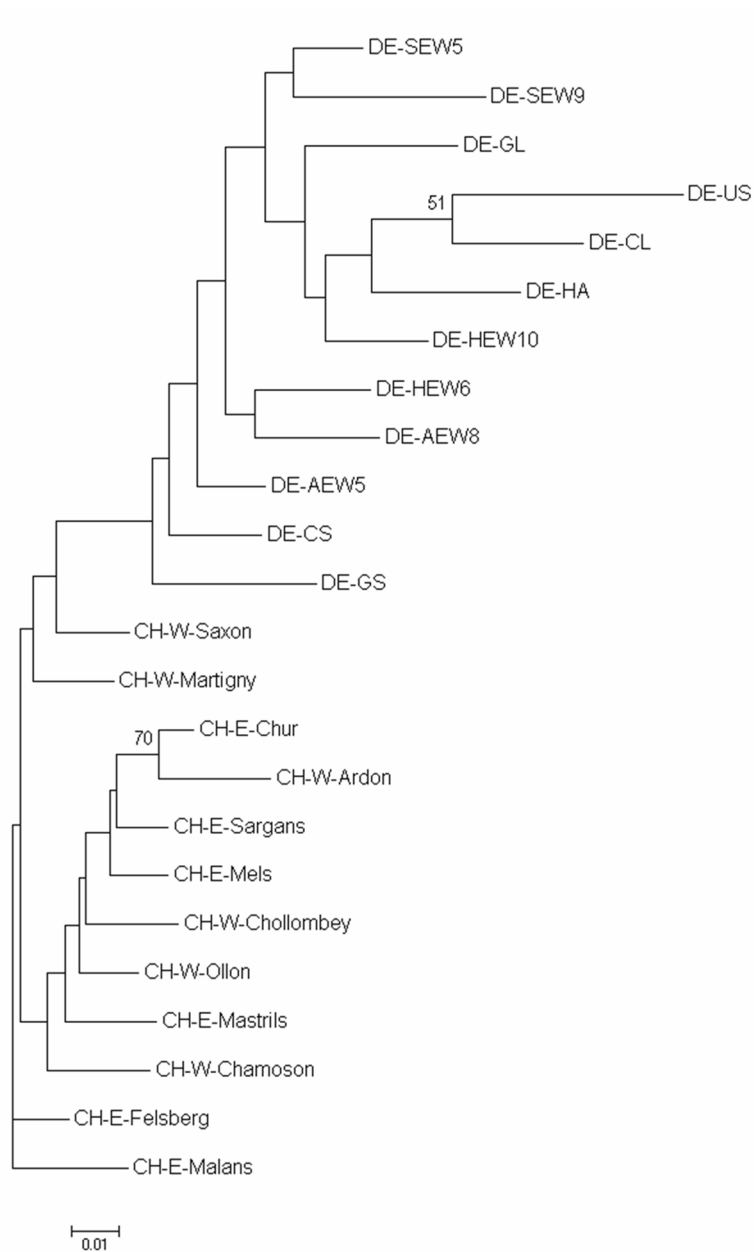

**Figure S6** Neighbor-joining dendrogram of the adult populations based on SSRs and 25 randomly selected individuals per population. Bootstrapping values  $\geq 50$  are shown
