# Supplementary material
Source: MDPI journal article supplement (https://www.mdpi.com/1999-4907/9/8/469)
Supplement: s1 [file s1]

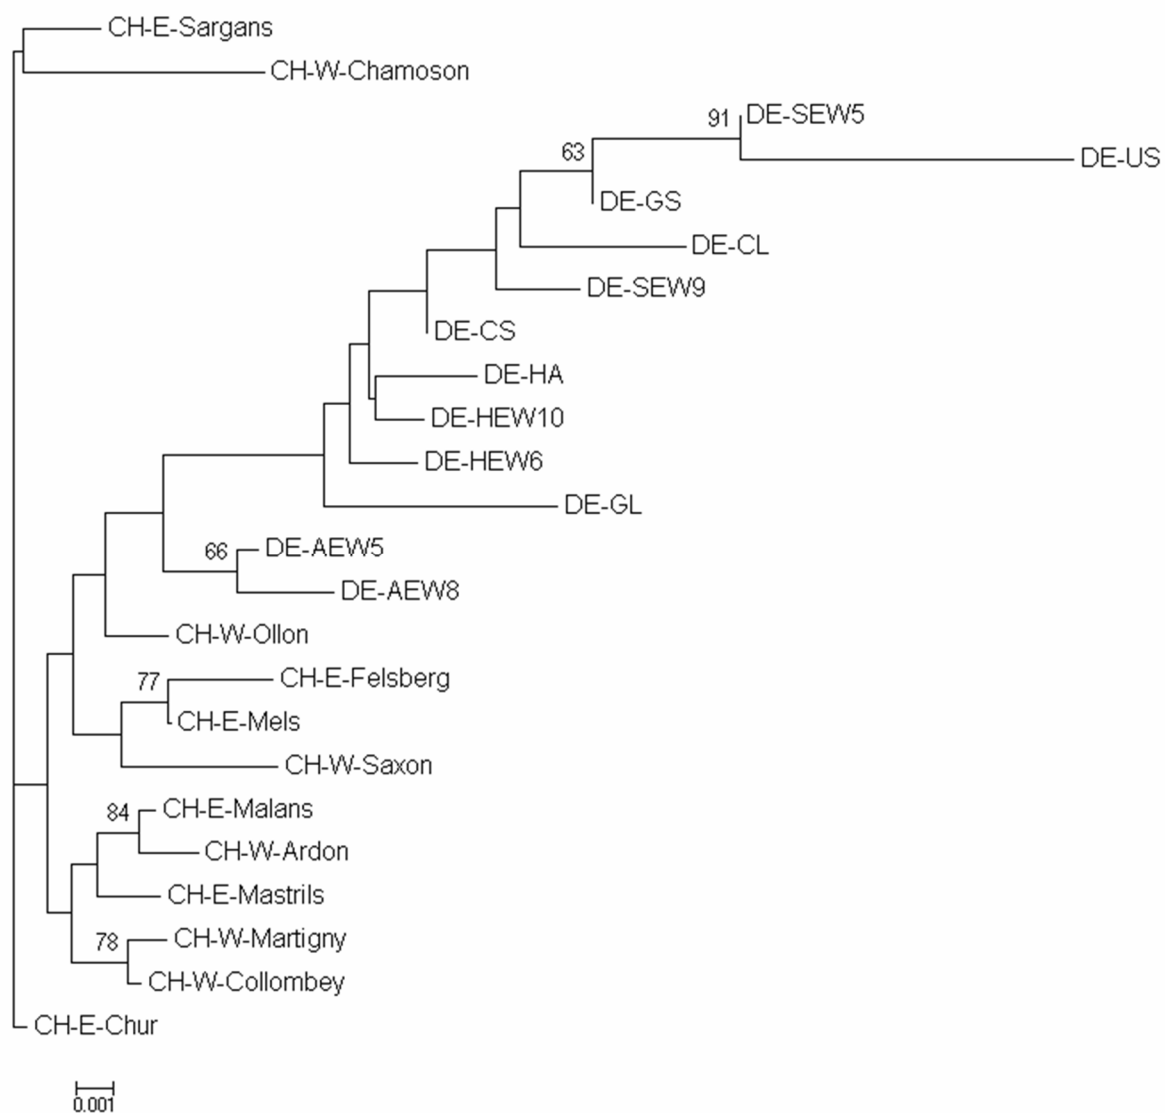

**Figure S4** Neighbor joining dendrogram for the seedling populations based on the SNP markers and Nei's distance (Nei 1972). Bootstrapping values  $\geq 50$  are shown
