# Supplementary material
Source: MDPI journal article supplement (https://www.mdpi.com/1999-4907/9/8/469)
Supplement: s1 [file s1]

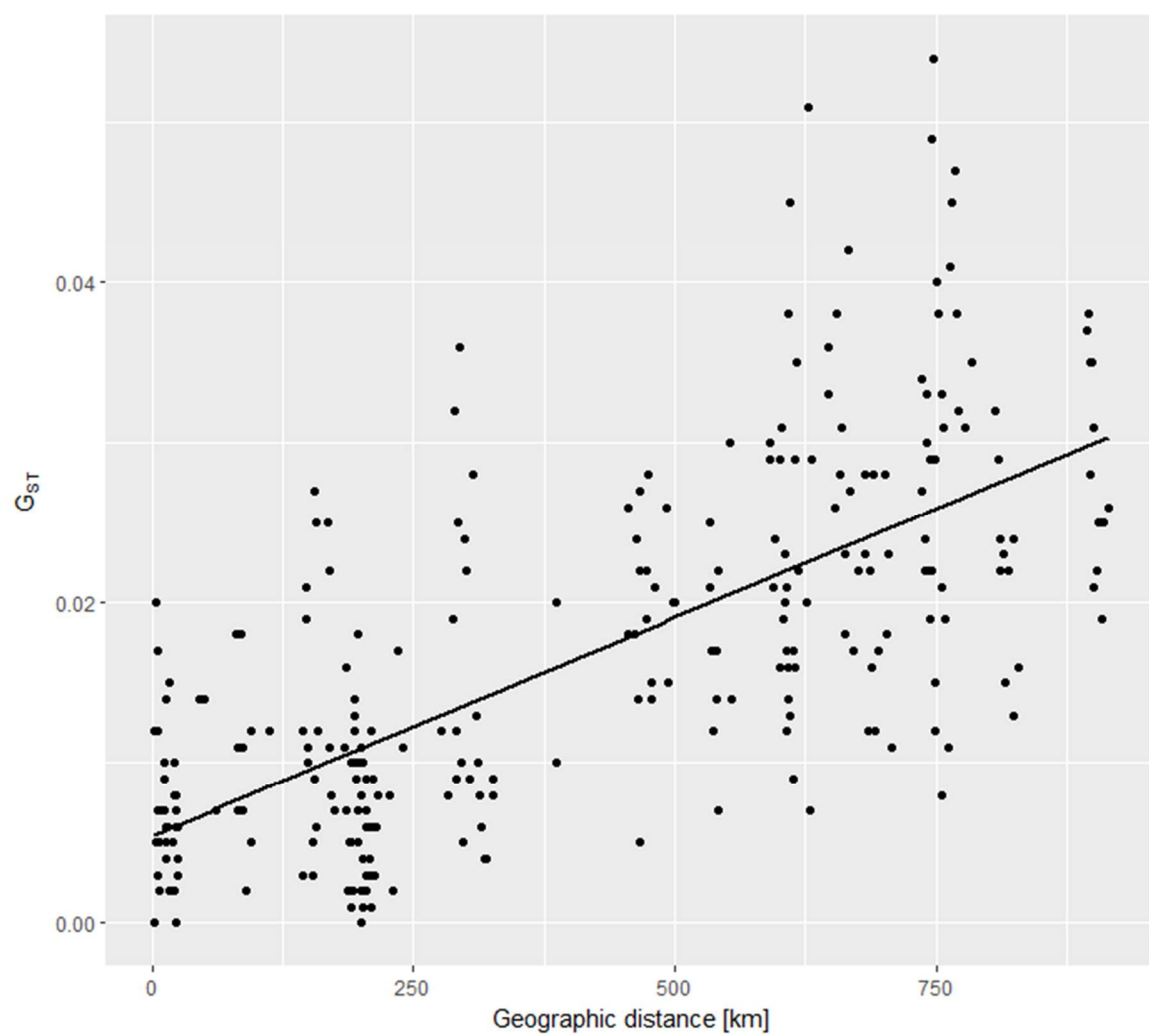

**Figure S1** Mantel test for correlation of geographic distance with genetic distance measured as pairwise  $G_{ST}$  between adult tree populations
